# Supplementary material for: “Language means freedom to me” perspectives of Deaf and hard-of-hearing students on their experiences in the English as a foreign language classroom
Source: Frontiers journal article supplement (doi:10.3389/feduc.2024.1447191), 2024-10-30
Supplement: Table_1.pdf [file Table_1.pdf]

Supplementary table 1: List of MAXQDA codes

| List of Codes                                                       | Frequency |
|---------------------------------------------------------------------|-----------|
| Criticism of English lessons                                        | 8         |
| Criticism of English lessons > Level                                | 2         |
| Criticism of English lessons > Lack of variety/ monotonous          | 4         |
| Criticism of English lessons > Tests                                | 1         |
| Criticism of English lessons > SEE / PSE                            | 1         |
| Criticism of English lessons > Form of exam                         | 3         |
| Criticism of English lessons > Listening comprehension task         | 2         |
| Criticism of English lessons > Lack of culture / lack sensitization | 2         |
| Criticism of English lessons > Assessment                           | 2         |
| Criticism of English lessons > Missing language separation          | 9         |
| Criticism of English lessons > Lack of interaction / participation  | 2         |
| Criticism of English lessons > Grammar                              | 2         |
| Criticism of English lessons > Spoken language                      | 4         |
| Criticism of English lessons > Pressure                             | 1         |
| Criticism of English lessons > No ASL/BSL/ no competency            | 21        |
| Criticism of English lessons > Reading comprehension                | 1         |
| Criticism of English lessons > Text-based tasks                     | 5         |
| Importance of languages                                             | 26        |

|                                                                                               |    |
|-----------------------------------------------------------------------------------------------|----|
| Relevance/importance > Acquisition                                                            | 3  |
| Relevance/importance > Work context                                                           | 1  |
| Application context outside of school                                                         | 0  |
| Application context outside of school > BSL                                                   | 0  |
| Application context outside of school > BSL > Friends                                         | 1  |
| Application context outside of school > BSL > Holidays                                        | 1  |
| Application context outside of school > BSL > Social media                                    | 1  |
| Application context outside of school > Auslan                                                | 2  |
| Application context outside of school > English written and spoken language                   | 4  |
| Application context outside of school > English written and spoken language > Music           | 2  |
| Application context outside of school > English written and spoken language > Work            | 1  |
| Application context outside of school > English written and spoken language > University      | 5  |
| Application context outside of school > English written and spoken language > Social media    | 12 |
| Application context outside of school > English written and spoken language > Social contacts | 6  |
| Application context outside of school > English written and spoken language > Voluntary work  | 1  |
| Application context outside of school > English written and spoken language > Mobile phone    | 4  |
| Application context outside of school > English written and spoken language > Films           | 11 |

|                                                                                               |    |
|-----------------------------------------------------------------------------------------------|----|
| Application context outside of school > English written and spoken language > Books           | 5  |
| Application context outside of school > English written and spoken language > Friends         | 7  |
| Application context outside of school > English written and spoken language > Travelling      | 3  |
| Application context outside of school > English written and spoken language > No everyday use | 9  |
| Application context outside of school > International Sign                                    | 1  |
| Application context outside of school > International Sign > Staying abroad                   | 2  |
| Application context outside of school > International Sign > None/hardly any use              | 2  |
| Application context outside of school > International Sign > Social media                     | 5  |
| Application context outside of school > International Sign > Holidays                         | 2  |
| Application context outside of school > International Sign > Social contacts                  | 6  |
| Application context outside of school > International Sign > Friends                          | 3  |
| Application context outside of school > International Sign > Cultural events/ Festivals       | 3  |
| Application context outside of school > ASL                                                   | 0  |
| Application context outside of school > ASL > No use                                          | 3  |
| Application context outside of school > ASL > Social media                                    | 17 |
| Application context outside of school > ASL > Media                                           | 1  |
| Application context outside of school > ASL > Staying abroad                                  | 5  |
| Application context outside of school > ASL > Cultural events/ Festivals                      | 5  |

|                                                               |    |
|---------------------------------------------------------------|----|
| Application context outside of school > ASL > Social contacts | 5  |
| Application context outside of school > ASL > Friends         | 11 |
| Language in the EFL classroom                                 | 1  |
| Language in the EFL classroom > Language Switching            | 13 |
| Language in the EFL classroom > SEE                           | 5  |
| Language in the EFL classroom > LBG                           | 4  |
| Language in the EFL classroom > BSL                           | 6  |
| Language in the EFL classroom > DGS with English mouthing     | 23 |
| Language in the EFL classroom > Spoken German                 | 13 |
| Language in the EFL classroom > Written English               | 19 |
| Language in the EFL classroom > Spoken English                | 22 |
| Language in the EFL classroom > ASL                           | 32 |
| Language in the EFL classroom > DGS                           | 17 |
